# Supplementary material
Source: Springer Nature journal article supplement (https://www.springermedizin.de/resource/supplementary/13054_2013_2873_MOESM2_ESM.pdf/9714062)

**Nosocomial Bacteremia (NB)**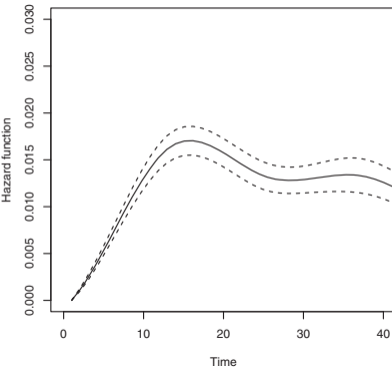**Death without NB**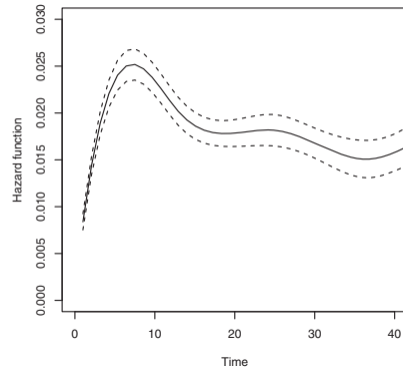**Discharge without NB**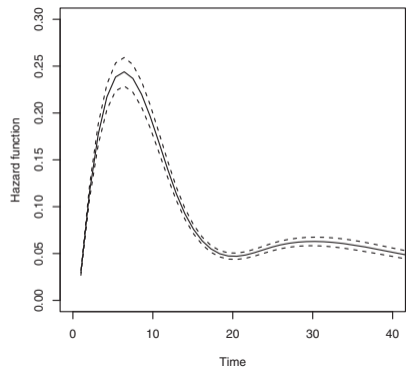

Supplement: MOESM2 [file 9714062]
